# Supplementary material for: All of Us diversity and scale improve polygenic prediction contextually with greatest improvements for under-represented populations
Source: PubMed Central journal article supplement — bioRxiv. 2025 May 8:2024.08.06.606846. Originally published 2024 Aug 6. Preprint. [Version 2] doi: 10.1101/2024.08.06.606846 (PMC11326295; doi:10.1101/2024.08.06.606846), 2025-05-08
Supplement: media-1.pdf [file media-1.pdf]

# Supplementary Figures

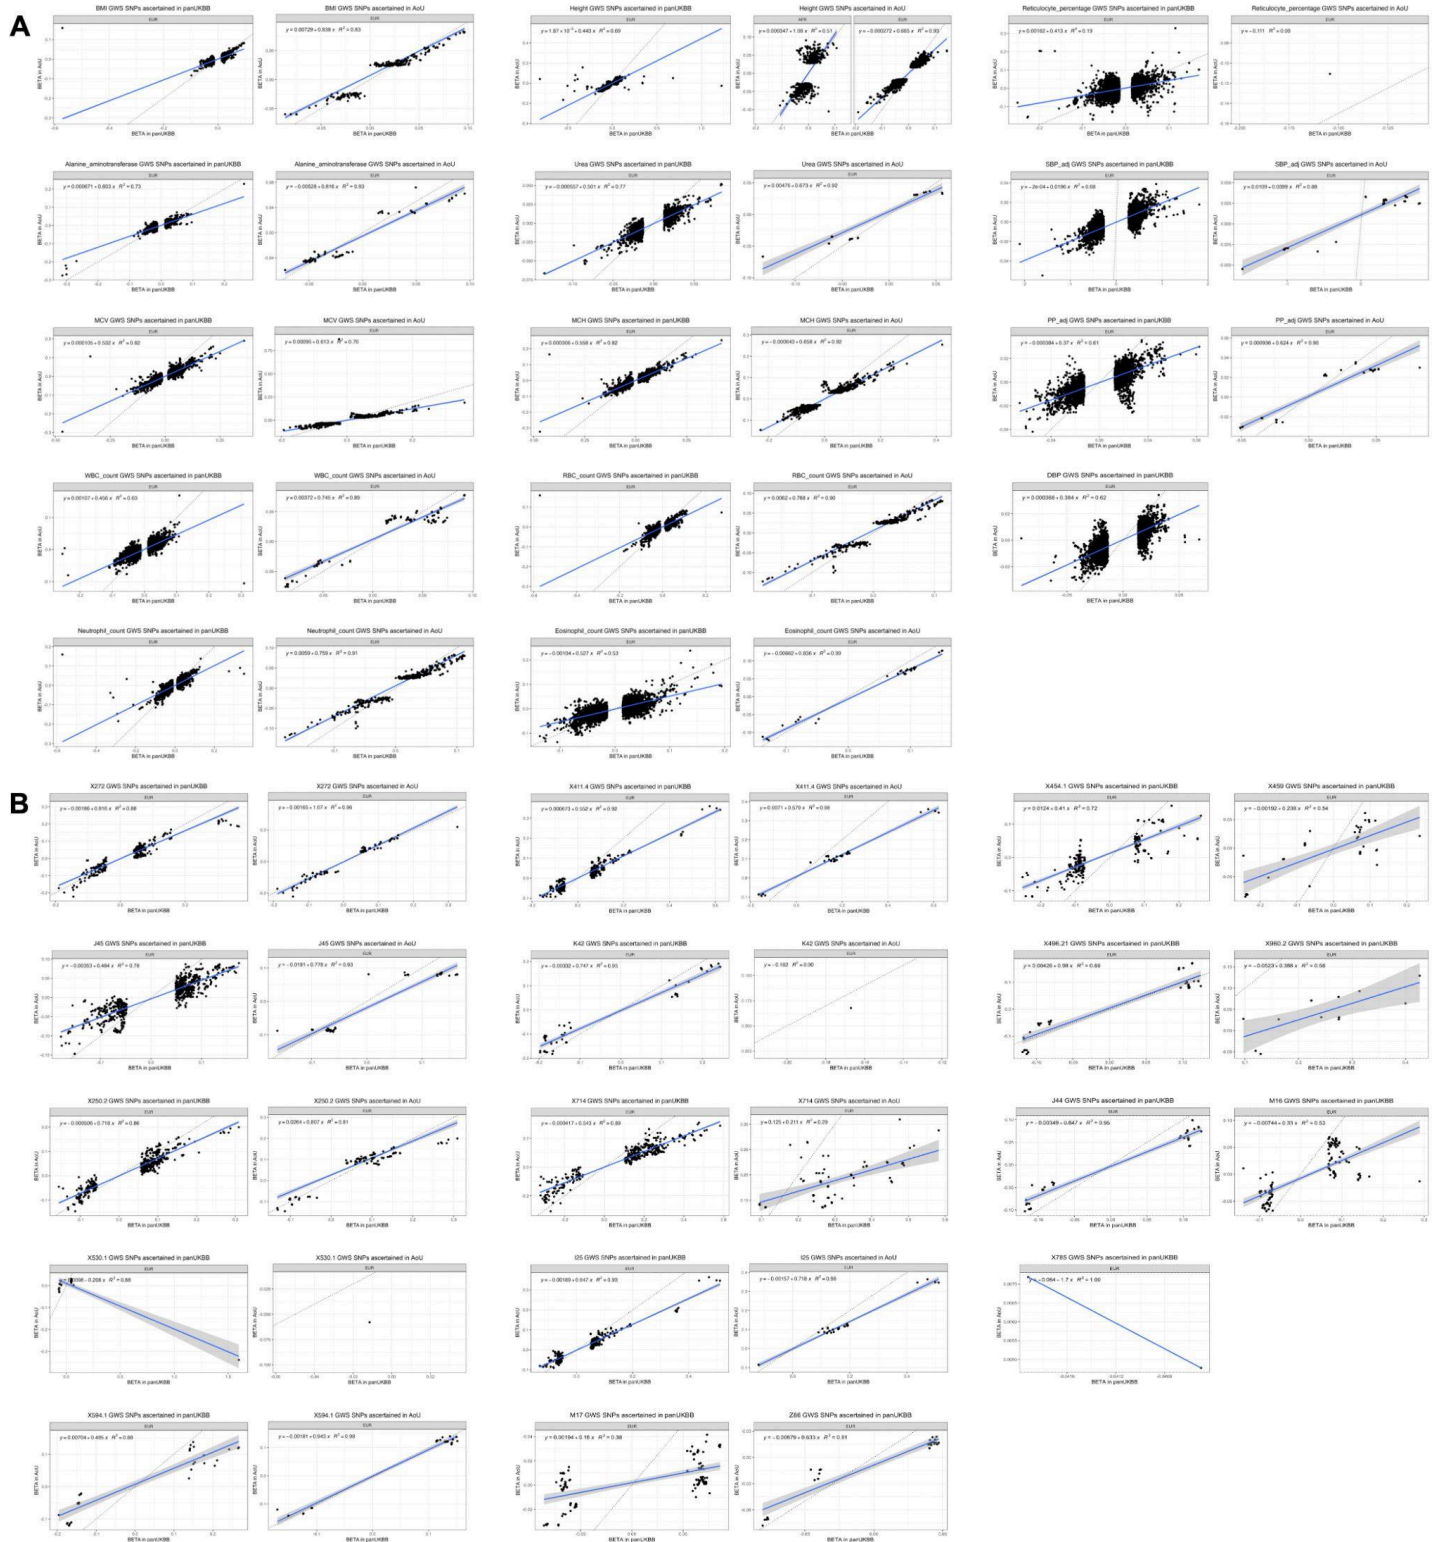

**Supplementary Figure 1. Effect size comparisons.** Effect sizes of genome-wide significant (GWS), clumped variants ascertained in AoU and UKB GWAS. Effect sizes from UKB GWAS are represented on x-axes; effect sizes from AoU GWAS are represented on y-axes. A) Quantitative phenotypes. B) Binary phenotypes.

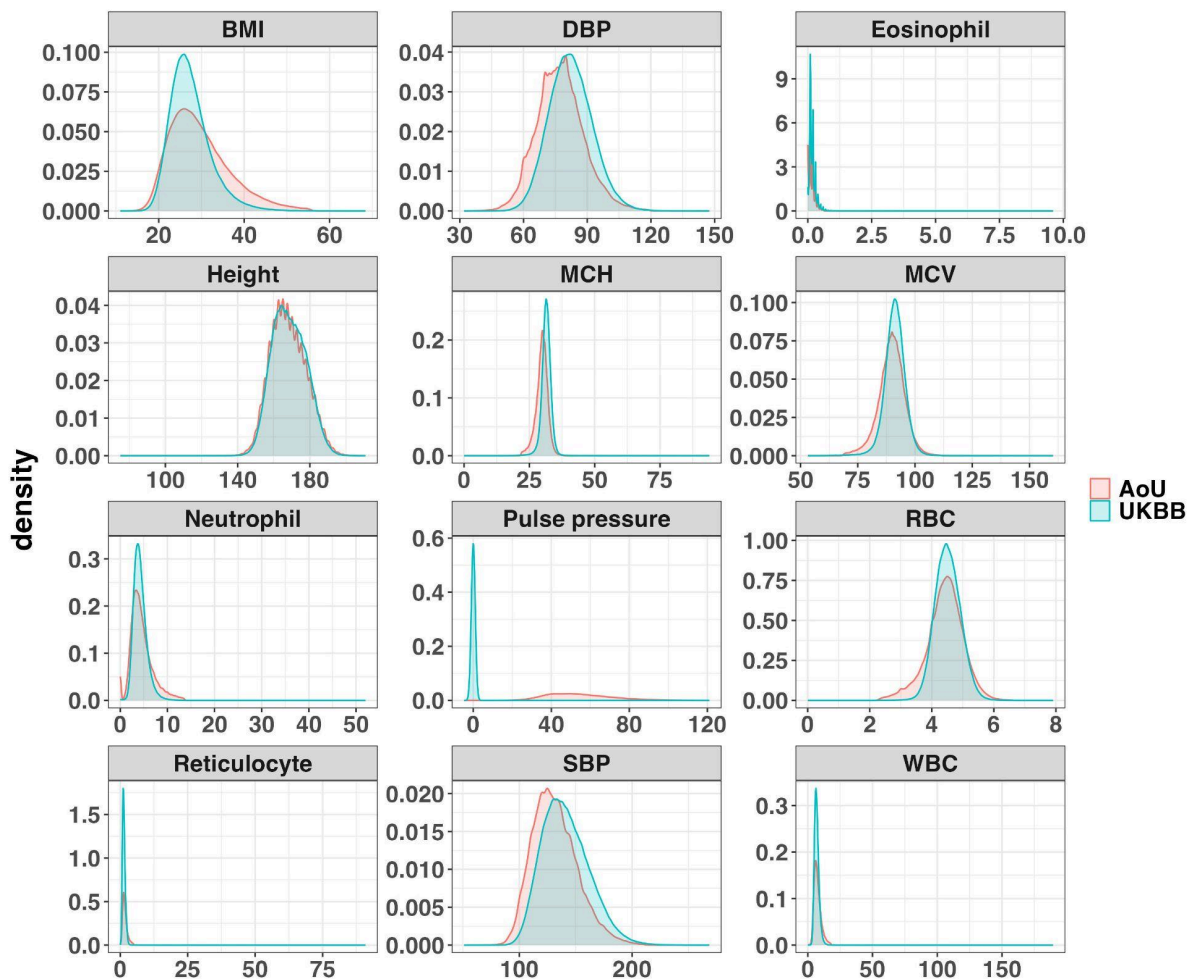

**Supplementary Figure 2. Phenotype distributions of quantitative traits in AoU vs. UKB.** Phenotype values are represented on x-axes. Blue curves represent distribution in UKB and red curves represent distribution in AoU. (BMI = body mass index; DBP = diastolic blood pressure; Eosinophil = eosinophil count; MCH = mean corpuscular hemoglobin; MCV = mean corpuscular volume; Neutrophil = neutrophil count; RBC = red blood cell count; Reticulocyte = reticulocyte percentage; SBP = systolic blood pressure; WBC = white blood cell count)

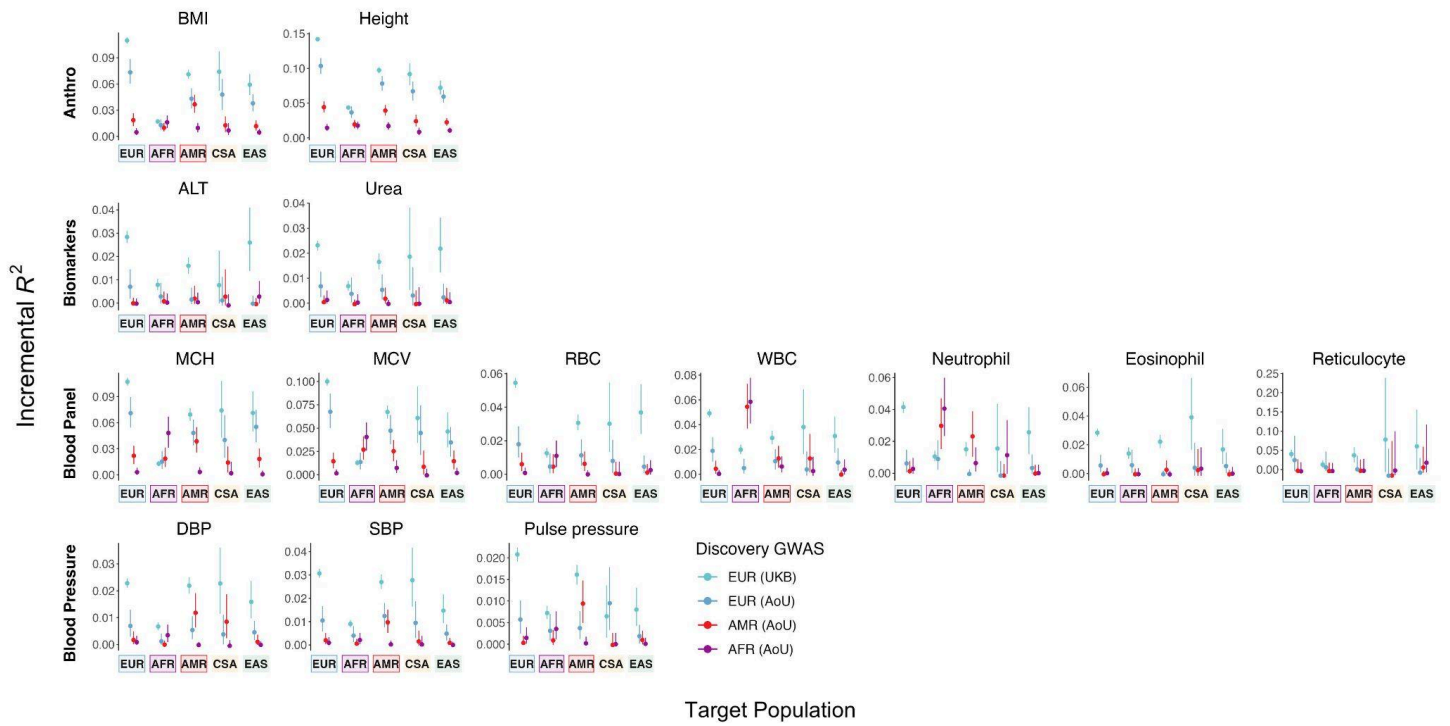

**Supplementary Figure 3. Performance of PRS derived from single-ancestry discovery GWAS from AoU and UKB for quantitative traits.** Quantitative traits are divided into categories: anthropometric traits, biomarkers, blood panel traits, and blood pressure traits. PRS were constructed from PRS-CS applied to EUR GWAS from UKB and AoU, as well as AMR and AFR GWAS from AoU. Target populations from AoU are shown on x-axes and target populations with ancestry-matched PRS are outlined; PRS performance as measured by incremental  $R^2$  is shown on y-axes.

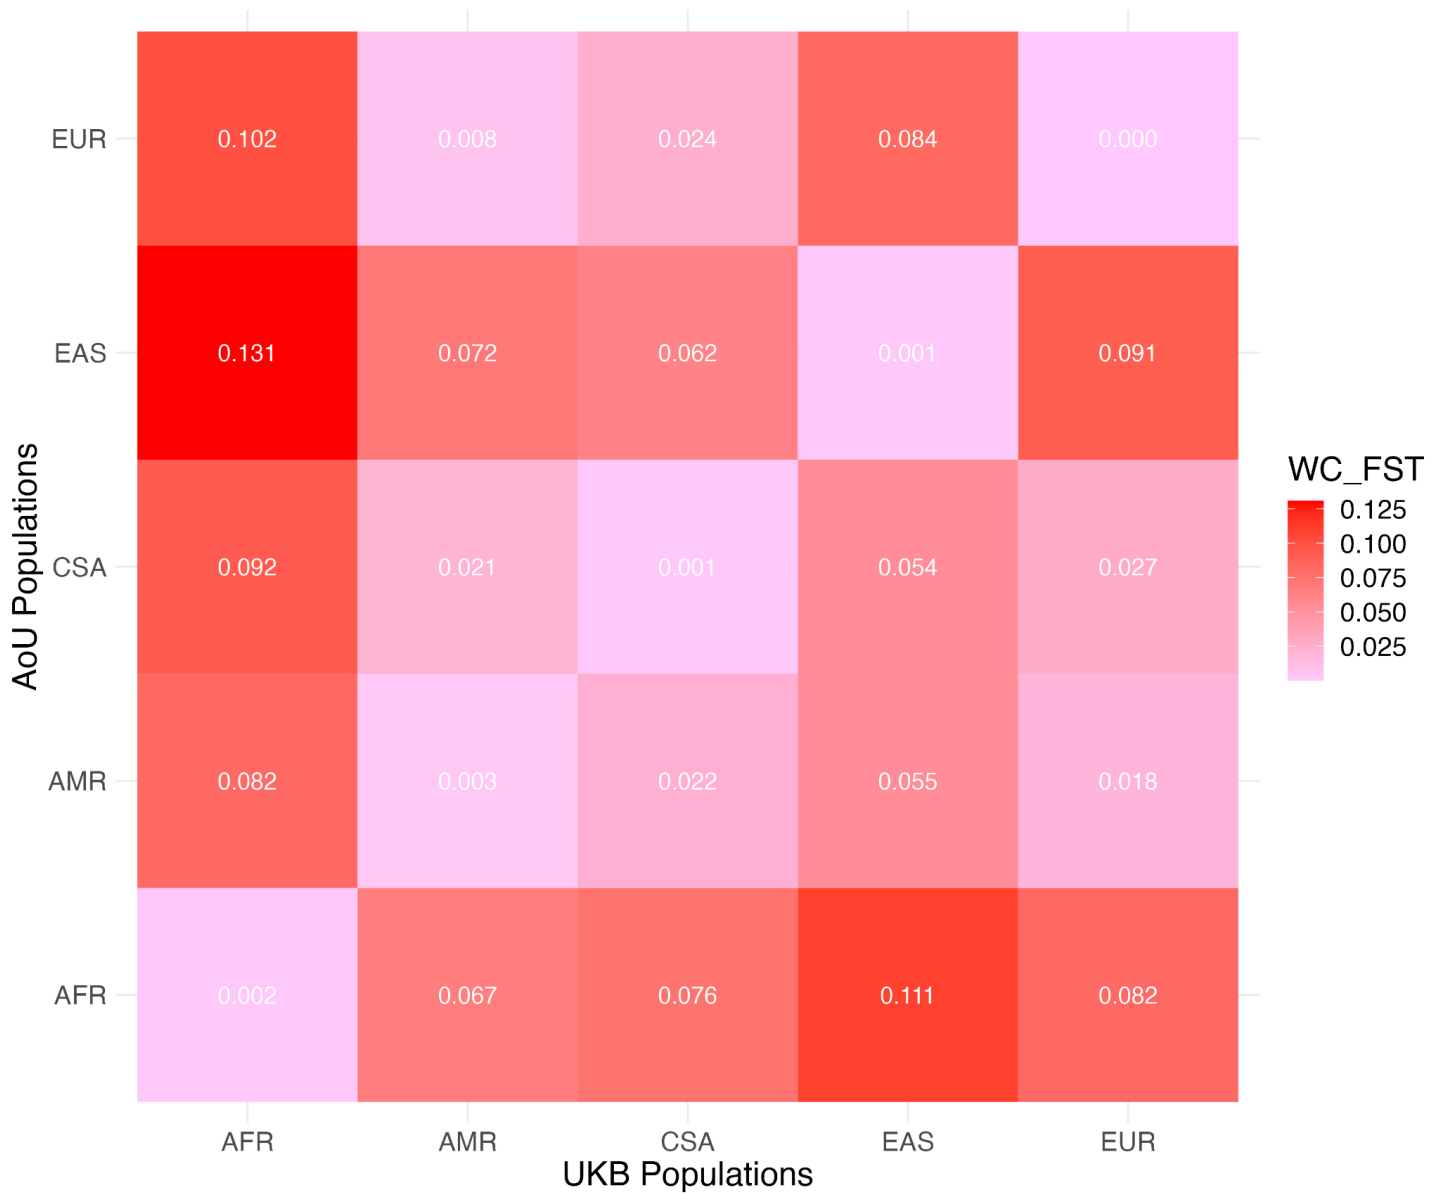

**Supplementary Figure 4. Genetic distance between populations in AoU and UKB.** Population genetic differentiation, as measured by Wright's fixation index,  $F_{st}$ , between genetic ancestry groups in UKB vs. AoU.

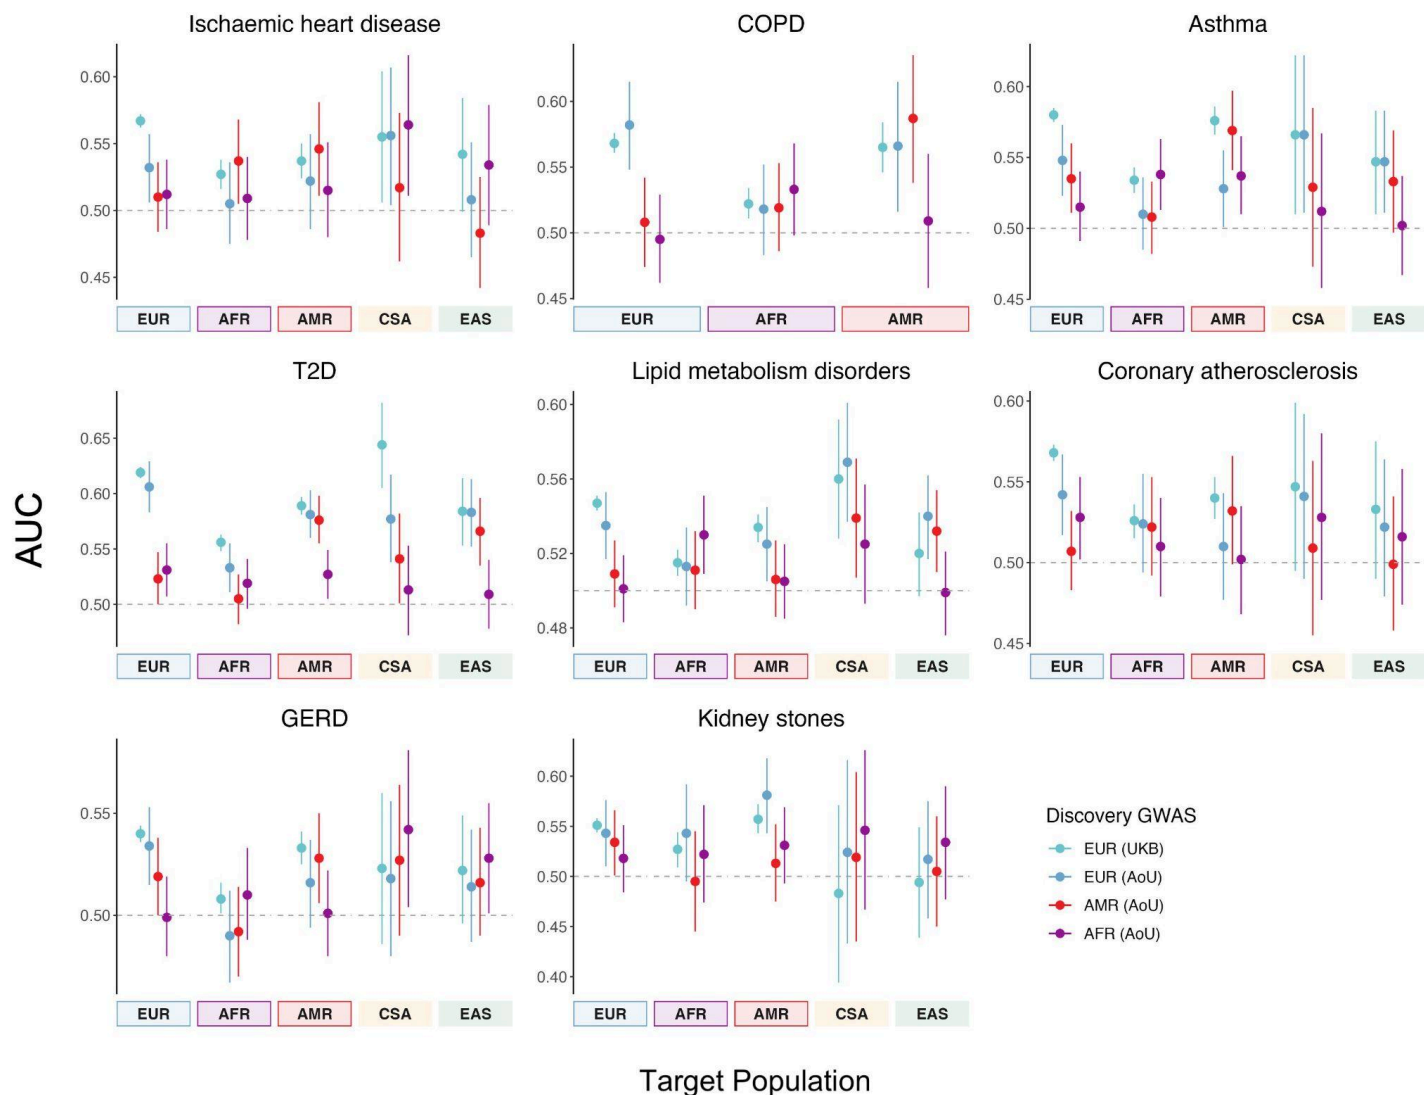

**Supplementary Figure 5. Performance of PRS derived from single-ancestry discovery GWAS from AoU and UKB for binary phenotypes.** PRS were constructed from PRS-CS applied to EUR GWAS from UKB and AoU, as well as AMR and AFR GWAS from AoU. Target populations from AoU are shown on x-axes and target populations with ancestry-matched PRS are outlined; PRS performance as measured by AUC is shown on y-axes.

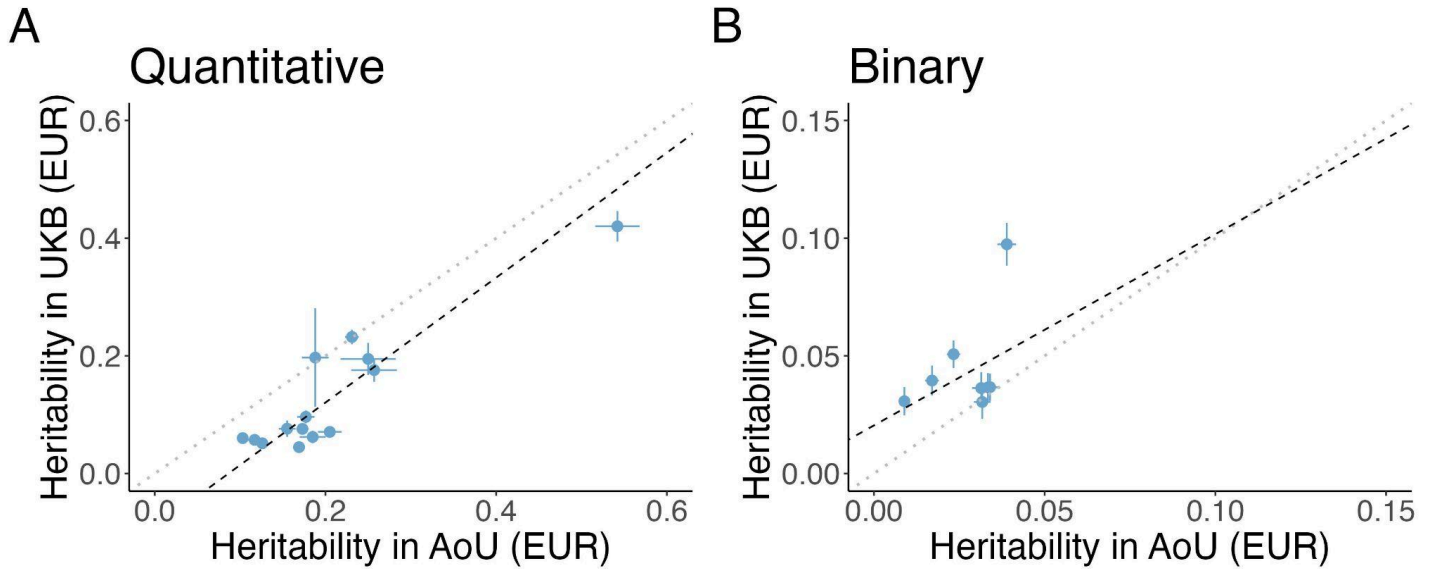

**Supplementary Figure 6. Comparison of SNP-based heritability estimates derived from AoU and UKB.** Each point represents a phenotype. SNP-based heritability was estimated from EUR GWAS using LDSC. Dotted line is  $x=y$  line; dashed line is slope estimated from York regression analysis. A) 14 quantitative phenotypes. B) 8 binary phenotypes with at least 10,000 cases and  $>0.03$  heritability estimates from AoU EUR GWAS.

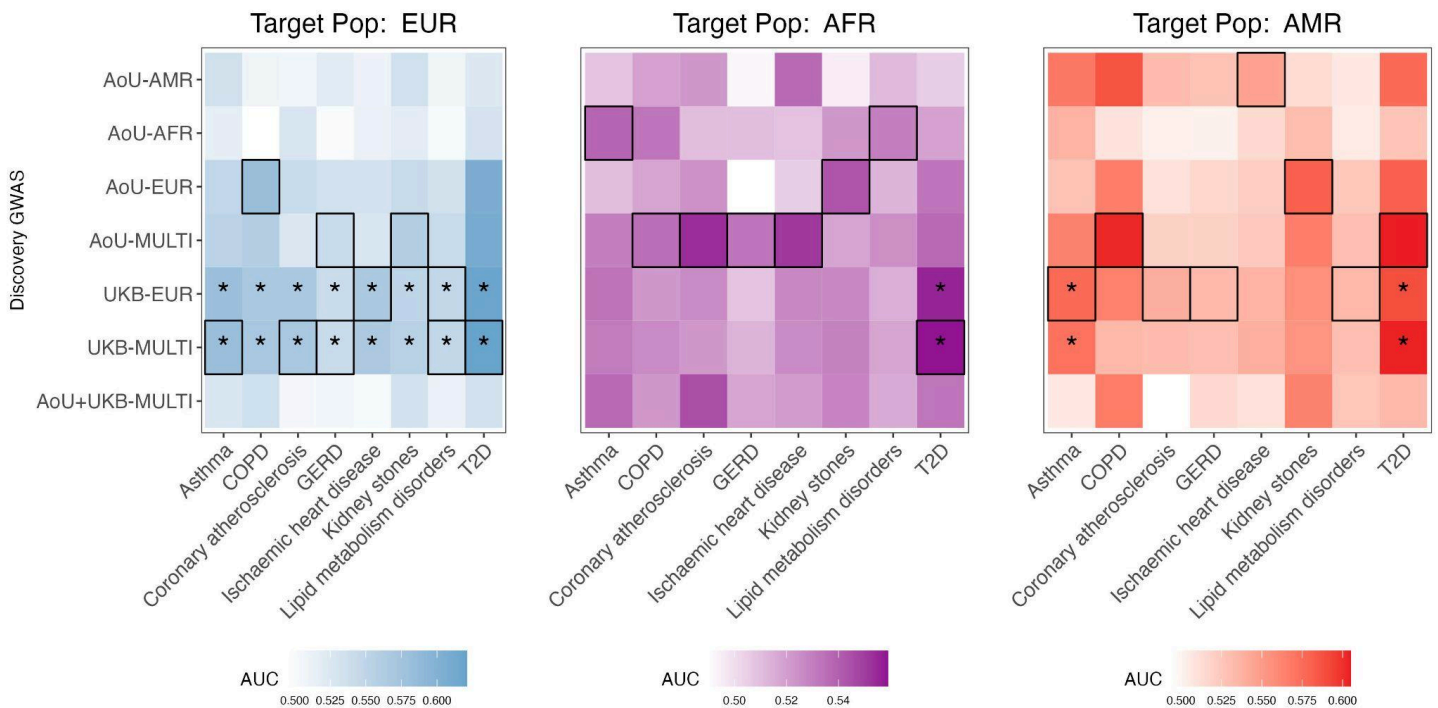

**Supplementary Figure 7. Performance of all PRS models for binary phenotypes.** PRS derived from discovery GWAS, denoted on y-axis, for binary phenotypes denoted on x-axis. PRS model with highest AUC per trait is outlined. Asterisk indicates AUC significantly greater than 0.5 (t-test,  $p < 0.05$ ).

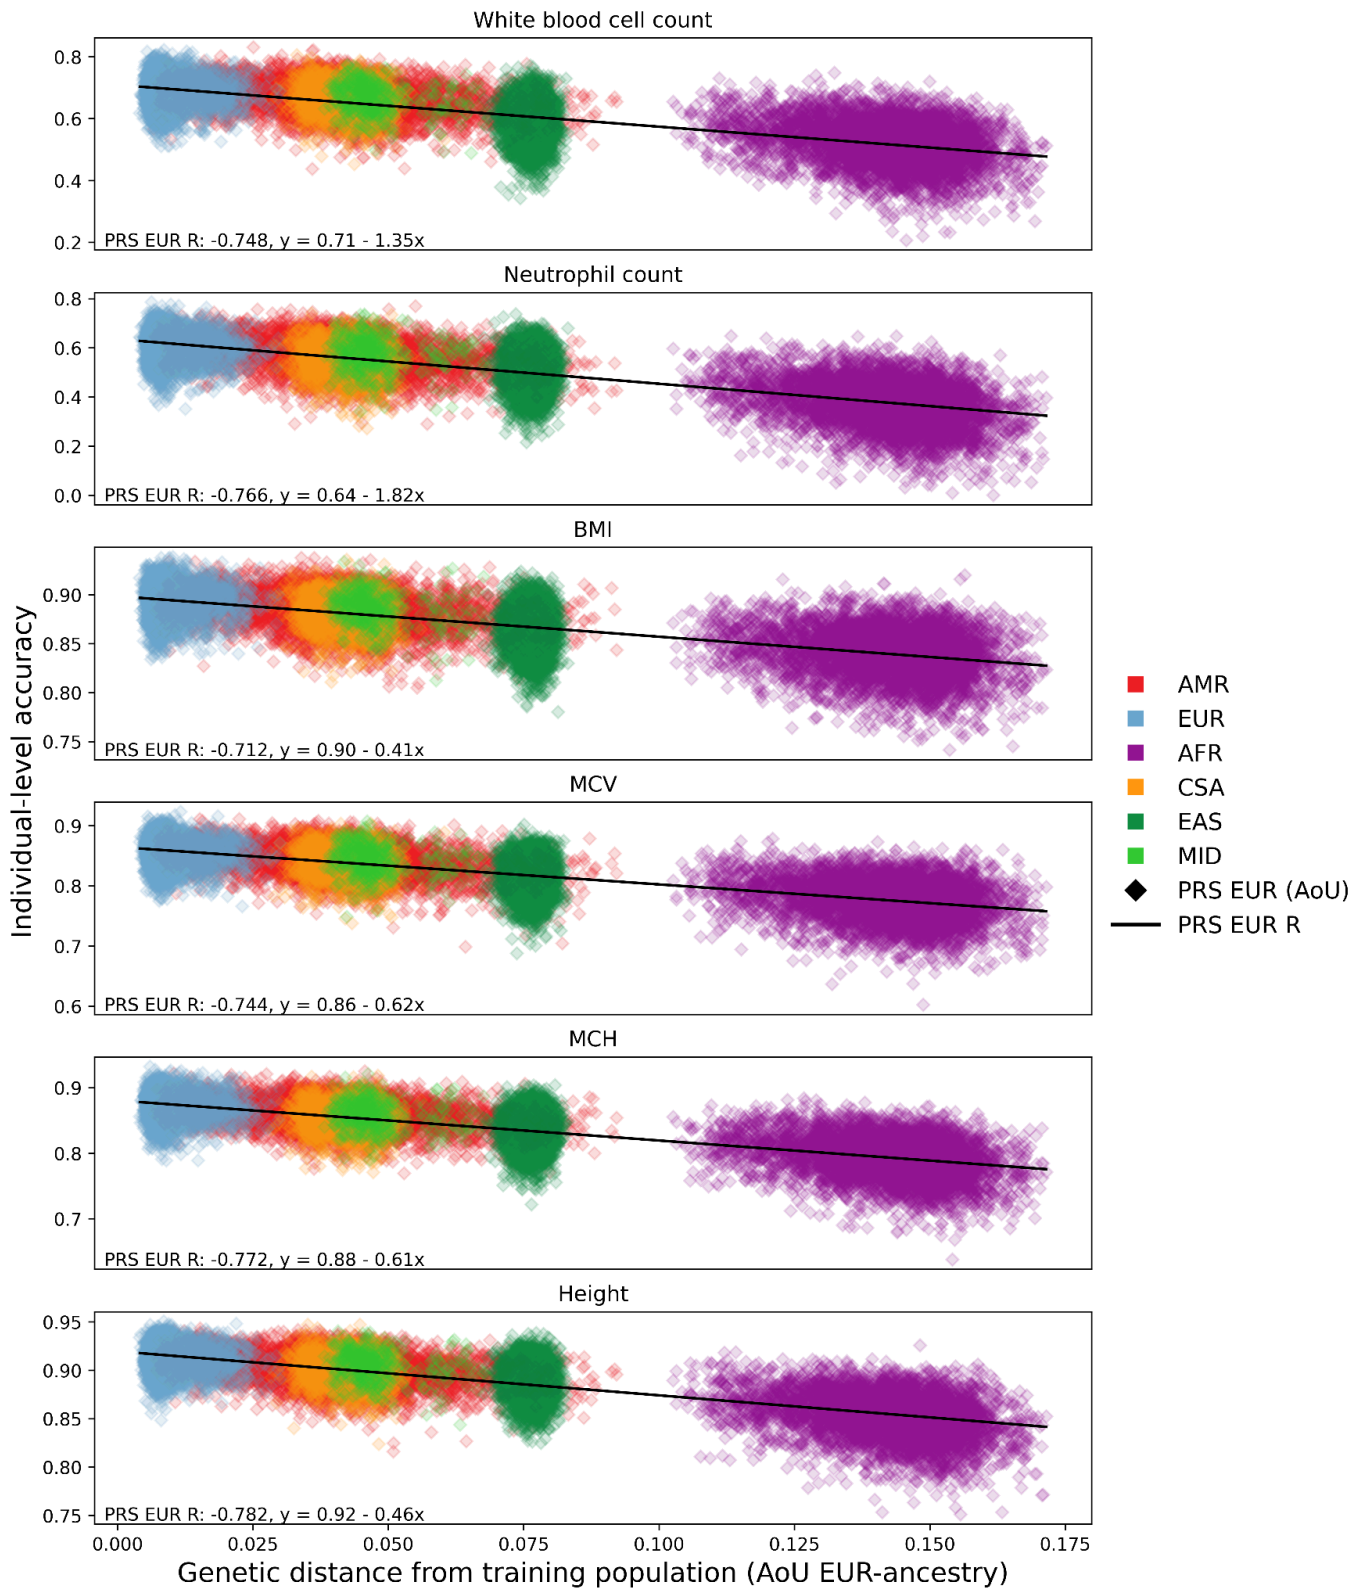

**Supplementary Figure 8. Individual-level accuracy for PRS derived from AoU EUR GWAS.** Each point represents a target individual in AoU. The x-axis represents the genetic distance (GD) of each target individual from the EUR discovery group in AoU. The y-axis shows the PRS accuracy, which was scaled to enable cross-trait comparisons of decay in accuracy as a function of GD; as a result, proportions of genetic liability explained by PRS for each individual are not represented here. R was calculated as the correlation between GD and PRS accuracy from a two-sided Pearson correlation test. The colors represent genetic ancestry groups as inferred by PCA.

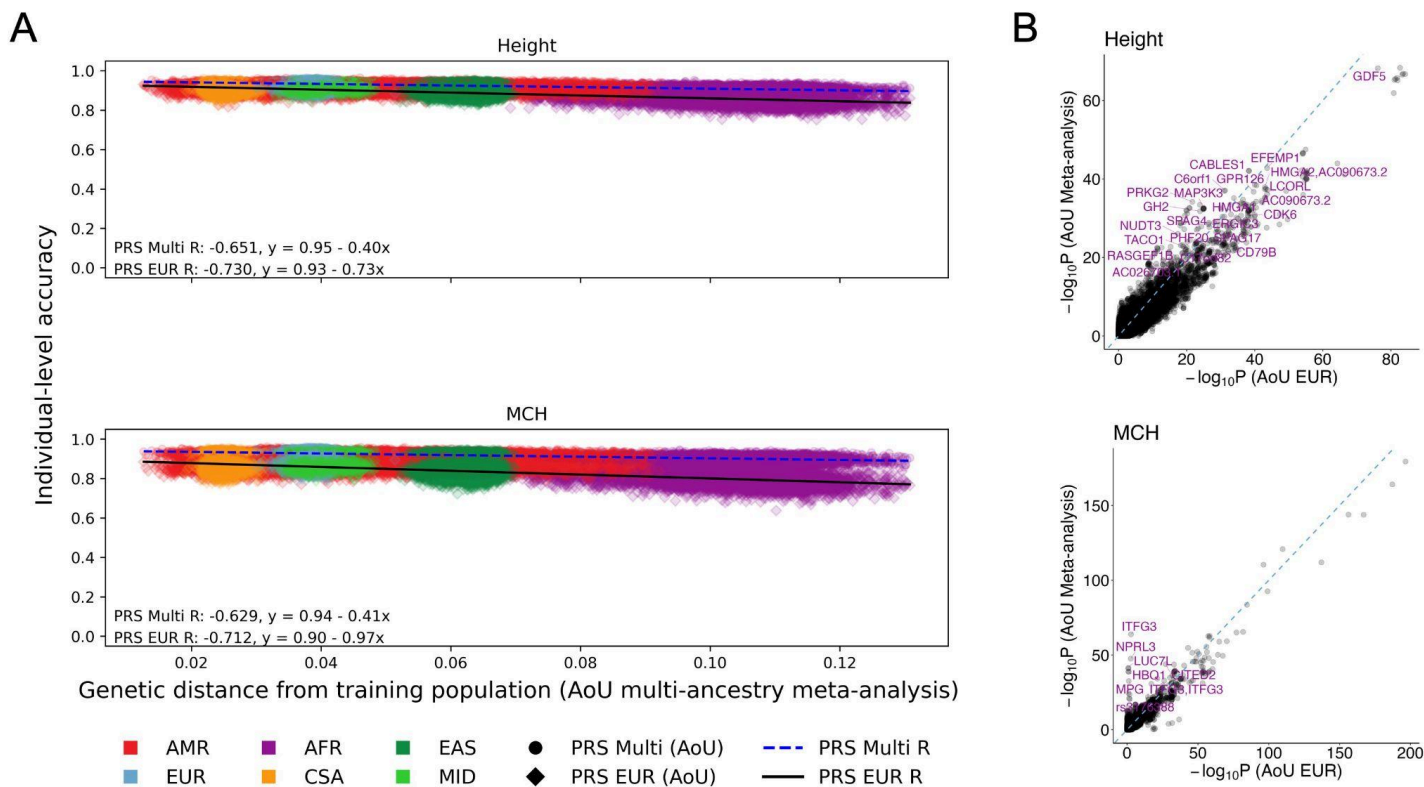

**Supplementary Figure 9. Individual-level accuracy for height and MCH PRS derived from AoU multi-ancestry meta-analyses.** A) Individual-level accuracy derived from AoU multi-ancestry meta-analyses and EUR GWAS across target individuals in AoU, represented by each point. The x-axis represents the genetic distance (GD) of each target individual from the combined discovery populations included in the AoU multi-ancestry meta-analyses. The y-axis shows the PRS accuracy, which was scaled to enable cross-trait comparisons of decay in accuracy as a function of GD; as a result, proportions of genetic liability explained by PRS for each individual are not represented here. R was calculated as the correlation between GD and PRS accuracy from a two-sided Pearson correlation test. The colors represent genetic ancestry groups as inferred by PCA. B) Comparison of GWAS significance in AoU multi-ancestry meta-analyses and AoU EUR GWAS for height and MCH. SNPs tested in both the AoU multi-ancestry meta-analyses and EUR GWAS are represented by each point. SNPs reaching genome-wide significance ( $p < 5e-8$ ) in the AoU meta-analysis and AoU AFR GWAS for each phenotype are annotated. Dashed lines indicate  $y=x$ ; x- and y-axis scales are specific to each phenotype and differ according to scale of significance in meta-analyses vs. EUR GWAS.
